# Supplementary material
Source: MDPI journal article supplement (https://www.mdpi.com/2075-163X/13/10/1294)
Supplement: s1 [file s1]

**Table S1.** Rheological parameters of Peramola (P) and Sant Joan de Mediona (JM) bauxitic samples.  
PL, plastic limit; LL, liquid limit; PI, plasticity index .

| Sample | PL    | LL    | PI    |
|--------|-------|-------|-------|
| JM2    | 26.42 | 32.18 | 5.76  |
| P1     | 20.22 | 26.35 | 6.14  |
| P2     | 26.45 | 50.26 | 23.81 |
| P3     | 25.00 | 31.76 | 6.76  |
| P10-B  | 30.13 | 30.27 | 0.14  |
| P10-V  | 20.87 | 23.70 | 2.83  |
| P11-A  | 25.29 | 27.51 | 2.22  |
| P11-B  | 19.80 | 26.21 | 6.42  |
| P14-3  | 26.18 | 35.45 | 9.27  |
| P15-1  | 21.79 | 22.09 | 0.30  |
| P15-2  | 21.90 | 24.18 | 2.28  |
| P15-3  | 24.92 | 26.61 | 1.69  |
| P15-4  | 25.36 | 27.21 | 1.85  |
